# Supplementary material
Source: HighWire-hosted journal article supplement (https://tobaccocontrol.bmj.com/content/tc-2023-058163)
Supplement: inline-supplementary-material-4 [file inline-supplementary-material-4.pdf]

**SupplementaryData\_TableS3. Environmental persistence, bioaccumulation, aquatic toxicity and hazard concentration value estimations for e-cigarette e-liquid chemicals.** Chemicals included in U.S. Environmental Protection Agency's Hazardous waste list and in U.S. Food and Drug Administration's Harmful and Potentially Harmful Constituents in Tobacco Products and Smoke are also identified.

| Variable                             | Description                                                                                                                                                                                                                                                                                                                                                                                                              |
|--------------------------------------|--------------------------------------------------------------------------------------------------------------------------------------------------------------------------------------------------------------------------------------------------------------------------------------------------------------------------------------------------------------------------------------------------------------------------|
| CASRN                                | CAS registry number - a unique numeric identifier that provides an unambiguous means to distinguish chemical substances                                                                                                                                                                                                                                                                                                  |
| PREFERRED_NAME                       | Common name for the chemical                                                                                                                                                                                                                                                                                                                                                                                             |
| log Acute HC50 ( $\mu\text{g/L}$ )   | Hazardous concentration value (HC50; concentration affecting 50% of aquatic species) for acute toxicity (short-term)                                                                                                                                                                                                                                                                                                     |
| log Chronic HC50 ( $\mu\text{g/L}$ ) | Hazardous concentration value (HC50; concentration affecting 50% of aquatic species) for chronic toxicity (long-term)                                                                                                                                                                                                                                                                                                    |
| PBTclassification                    | Combined classification of persistence, bioaccumulation and toxicity. E-liquid chemicals were classified as persistent (P), bioaccumulative (B) or toxic to aquatic organisms (T). Chemicals classified as PBT, BT, and PT were selected for future detailed environmental evaluations and risk assessments. Metals and metalloids were excluded for PBT classification.                                                 |
| HPHC                                 | Established list of the chemicals and chemical compounds identified by U.S. Food & Drug Administration as Harmful and Potentially Harmful Constituents in Tobacco Products and Tobacco Smoke (HPHC), including proposed additions to HPHC list. Toxicity of the chemicals include Carcinogen (CA), Respiratory Toxicant (RT), Cardiovascular Toxicant (CT), Reproductive or Developmental Toxicant (RDT), Addictive (AD) |
| Hazardous waste listing              | U.S. Environmental protection Agency's list of hazardous constituents. The hazardous waste listing number includes acute hazardous waste (P list) and toxic waste (U list).                                                                                                                                                                                                                                              |
| Cigarette butt leachate              | Chemicals reported in cigarette butt leachate (from Venugopal et al. 2021) are identified by 'x'                                                                                                                                                                                                                                                                                                                         |
| Tobacco chemical                     | Chemicals reported in tobacco products (from Rodgman & Perfetti 2013) are identified by 'x'                                                                                                                                                                                                                                                                                                                              |

| CASRN      | PREFERRED_NAME                                      | log Acute HC50 (µg/L) | log Chronic HC50 (µg/L) | PBT classification | HPHC   | Hazardous waste listing | Cigarette butt leachate | Tobacco chemical |
|------------|-----------------------------------------------------|-----------------------|-------------------------|--------------------|--------|-------------------------|-------------------------|------------------|
| 7683-64-9  | Squalene                                            | -4.00                 | -5.57                   | PT                 |        |                         |                         | x                |
| 593-49-7   | Heptacosane                                         | -3.82                 | -5.17                   | T                  |        |                         |                         | x                |
| 55282-12-7 | Octadecane, 3-ethyl-5-(2-ethylbutyl)-               | -4.51                 | -4.59                   | T                  |        |                         |                         |                  |
| 6753-98-6  | alpha-Humulene                                      | -1.89                 | -2.92                   | PBT                |        |                         |                         |                  |
| 106-33-2   | Ethyl dodecanoate                                   | -0.21                 | -1.77                   | T                  |        |                         |                         | x                |
| 1117-55-1  | Hexyl octanoate                                     | -0.21                 | -1.77                   | T                  |        |                         |                         |                  |
| 105-90-8   | Geranyl propionate                                  | -0.25                 | -1.60                   | T                  |        |                         |                         | x                |
| 22485-54-7 | Cetyl benzoate                                      | -0.02                 | -1.47                   | BT                 |        |                         |                         | x                |
| 36431-72-8 | 2,6,10,10-Tetramethyl-1-oxaspiro[4.5]dec-6-ene      | -0.62                 | -1.41                   | BT                 |        |                         |                         | x                |
| 191-24-2   | Benzo(g,h,i)perylene                                | -0.33                 | -1.32                   | PT                 |        |                         |                         | x                |
| 141-14-0   | Citronellyl propionate                              | -0.29                 | -1.17                   | T                  |        |                         |                         |                  |
| 14905-56-7 | 2,6,10-Trimethyltetradecane                         | -0.68                 | -1.11                   | PBT                |        |                         |                         |                  |
| 607-91-0   | Myristicin                                          | 0.49                  | -1.10                   | T                  |        |                         |                         | x                |
| 110-38-3   | Ethyl decanoate                                     | 0.28                  | -1.00                   | T                  |        |                         |                         | x                |
| 35158-25-9 | 2-(1-Methylethyl)-5-methylhex-2-enal                | 0.23                  | -0.89                   | T                  |        |                         |                         | x                |
| 6909-30-4  | trans-d-Limonene oxide                              | -0.52                 | -0.82                   | T                  |        |                         |                         | x                |
| 112-61-8   | Methyl stearate                                     | 0.99                  | -0.72                   | T                  |        |                         |                         | x                |
| 10094-34-5 | alpha,alpha-Dimethylphenethyl butyrate              | -0.03                 | -0.64                   | T                  |        |                         |                         |                  |
| 8013-90-9  | 4-(2,6,6-trimethylcyclohex-2-en-1-yl)but-3-en-2-one | 0.08                  | -0.55                   | T                  |        |                         |                         | x                |
| 112-62-9   | Methyl (9Z)-octadec-9-enoate                        | 0.68                  | -0.54                   | T                  |        |                         |                         | x                |
| 13038-45-4 |                                                     | 0.68                  | -0.54                   | BT                 |        |                         |                         |                  |
| 43052-87-5 | 1-(2,6,6-Trimethyl-2-cyclohexen-1-yl)-2-butenone    | 0.18                  | -0.44                   | T                  |        |                         | x                       | x                |
| 628-97-7   | Ethyl hexadecanoate                                 | 1.15                  | -0.36                   | T                  |        |                         |                         |                  |
| 140-26-1   | Phenethyl isovalerate                               | 0.26                  | -0.28                   | T                  |        |                         |                         |                  |
| 106-72-9   | 2,6-Dimethylhept-5-enal                             | 0.46                  | -0.28                   | T                  |        |                         |                         | x                |
| 18479-51-1 | 3,7-Dimethyloct-6-en-3-ol                           | 0.62                  | -0.19                   | T                  |        |                         | x                       | x                |
| 205-99-2   | Benzo(b)fluoranthene                                | 0.57                  | -0.13                   | PBT                | CA, CT | Listed                  |                         |                  |

| CASRN      | PREFERRED_NAME                                                                  | log Acute HC50 (µg/L) | log Chronic HC50 (µg/L) | PBT classification | HPHC | Hazardous waste listing | Cigarette butt leachate | Tobacco chemical |
|------------|---------------------------------------------------------------------------------|-----------------------|-------------------------|--------------------|------|-------------------------|-------------------------|------------------|
| 6728-26-3  | (2E)-2-Hexenal                                                                  | 1.00                  | -0.12                   | T                  |      |                         |                         |                  |
| 102-16-9   | Benzyl phenylacetate                                                            | 0.32                  | -0.08                   | T                  |      |                         |                         |                  |
| 3623-51-6  | dl-Neomenthol                                                                   | 1.15                  | -0.08                   | T                  |      |                         |                         |                  |
| 821-55-6   | 2-Nonanone                                                                      | 4.18                  | 0.00                    | T                  |      |                         |                         |                  |
| 67-47-0    | 5-(Hydroxymethyl)-2-furfural                                                    | 4.53                  | 0.00                    | Not PBT            |      |                         |                         |                  |
| 501-52-0   | Hydrocinnamic acid                                                              | 5.09                  | 0.00                    | Not PBT            |      |                         |                         | x                |
| 589-18-4   | 4-Methylbenzyl alcohol                                                          | 5.58                  | 0.00                    | T                  |      |                         |                         | x                |
| 112-39-0   | Methyl hexadecanoate                                                            | 1.44                  | 0.08                    | T                  |      |                         |                         | x                |
| 4265-25-2  | 2-Methyl-1-benzofuran                                                           | 0.60                  | 0.11                    | T                  |      |                         |                         |                  |
| 540-18-1   | n-Amyl butyrate                                                                 | 1.00                  | 0.18                    | T                  |      |                         |                         | x                |
| 15679-13-7 | 2-Isopropyl-4-methylthiazole                                                    | 1.04                  | 0.20                    | T                  |      |                         |                         |                  |
| 2445-72-9  | Propanoic acid, 2-methyl-, pentyl ester                                         | 0.61                  | 0.23                    | T                  |      |                         |                         |                  |
| 34995-77-2 | 2-Furanmethanol, 5-ethenyltetrahydro-.alpha.,.alpha.,5-trimethyl-, (2R,5R)-rel- | 1.15                  | 0.28                    | T                  |      |                         |                         |                  |
| 5989-33-3  | 2-furanmethanol, 5-ethenyltetrahydro-.alpha.,.alpha.,5-trimethyl-, cis-         | 1.15                  | 0.28                    | T                  |      |                         |                         |                  |
| 104-53-0   | 3-Phenylpropanal                                                                | 1.04                  | 0.30                    | T                  |      |                         |                         |                  |
| 93-16-3    | 4-Prop-1-enylveratrole                                                          | 1.53                  | 0.34                    | T                  |      |                         |                         |                  |
| 2921-88-2  | Chlorpyrifos                                                                    | 1.05                  | 0.36                    | PBT                |      |                         |                         |                  |
| 574-09-4   | Ethanone, 2-ethoxy-1,2-diphenyl-                                                | 1.59                  | 0.40                    | PT                 |      |                         |                         | x                |
| 60-01-5    | Glycerol tributyrate                                                            | 0.72                  | 0.45                    | T                  |      |                         |                         | x                |
| 87-25-2    | Ethyl anthranilate                                                              | 1.26                  | 0.45                    | T                  |      |                         |                         |                  |
| 124-06-1   | Ethyl tetradecanoate                                                            | 1.65                  | 0.46                    | T                  |      |                         |                         |                  |
| 50-32-8    | Benzo(a)pyrene                                                                  | 1.48                  | 0.52                    | PT                 | CA   | U022                    |                         | x                |
| 122-78-1   | Phenylacetaldehyde                                                              | 1.30                  | 0.54                    | T                  |      |                         |                         |                  |
| 105-68-0   | 3-Methylbutyl propanoate                                                        | 1.28                  | 0.60                    | T                  |      |                         |                         |                  |
| 87-44-5    | beta-Caryophyllene                                                              | 1.61                  | 0.63                    | BT                 |      |                         |                         |                  |
| 3681-82-1  | trans-3-Hexenyl acetate                                                         | 1.34                  | 0.72                    | T                  |      |                         |                         | x                |
| 111-12-6   | Methyl 2-octynoate                                                              | 1.04                  | 0.76                    | T                  |      |                         |                         |                  |
| 489-39-4   | (+)-Aromadendrene                                                               | 2.18                  | 0.76                    | BT                 |      |                         |                         | x                |
| 585-74-0   | Ethanone, 1-(3-methylphenyl)-                                                   | 1.32                  | 0.83                    | T                  |      |                         |                         |                  |

| CASRN       | PREFERRED_NAME                               | log Acute HC50 (µg/L) | log Chronic HC50 (µg/L) | PBT classification | HPHC        | Hazardous waste listing | Cigarette butt leachate | Tobacco chemical |
|-------------|----------------------------------------------|-----------------------|-------------------------|--------------------|-------------|-------------------------|-------------------------|------------------|
| 621-59-0    | 3-Hydroxy-4-methoxy-benzaldehyde             | 1.94                  | 0.88                    | T                  |             |                         |                         | x                |
| 556-67-2    | Octamethylcyclotetrasiloxane                 | 1.90                  | 0.90                    | PBT                |             |                         |                         |                  |
| 108-48-5    | 2,6-Dimethylpyridine                         | 1.45                  | 0.99                    | Not PBT            |             |                         |                         | x                |
| 887407-16-1 | 1-Nitroso-1,2,3,6-tetrahydro-2,3'-bipyridine | 0.60                  | 1.00                    | PT                 |             |                         |                         | x                |
| 1365-19-1   | Linalool oxide                               | 1.45                  | 1.00                    | T                  |             |                         |                         | x                |
| 409-02-9    | Methyl heptenone                             | 1.86                  | 1.04                    | Not PBT            |             |                         |                         | x                |
| 104-20-1    | 4-(4-Methoxyphenyl)-2-butanone               | 2.20                  | 1.08                    | Not PBT            |             |                         |                         | x                |
| 106-29-6    | Geranyl butyrate                             | 2.51                  | 1.11                    | T                  |             |                         |                         | x                |
| 33467-73-1  | (3Z)-Hex-3-en-1-yl formate                   | 1.32                  | 1.15                    | T                  |             |                         |                         | x                |
| 122-48-5    | 4-(4-Hydroxy-3-methoxyphenyl)-2-butanone     | 2.08                  | 1.15                    | Not PBT            |             |                         |                         | x                |
| 78-32-0     | Tris(4-methylphenyl) phosphate               | 0.53                  | 1.18                    | PBT                |             |                         |                         | x                |
| 7439-97-6   | Mercury & Mercury Compounds                  | 2.26                  | 1.26                    | Metals             | CA, RDT     | Listed                  |                         |                  |
| 58-08-2     | Caffeine                                     | 4.59                  | 1.29                    | PT                 |             |                         |                         |                  |
| 1582-09-8   | Trifluralin                                  | 2.51                  | 1.32                    | PBT                |             |                         |                         | x                |
| 7440-50-8   | Copper                                       | 2.26                  | 1.34                    | Metals             |             |                         |                         |                  |
| 868-57-5    | Methyl 2-methylbutyrate                      | 1.72                  | 1.34                    | T                  |             |                         |                         | x                |
| 97-62-1     | Ethyl isobutyrate                            | 1.72                  | 1.34                    | T                  |             |                         |                         |                  |
| 15707-23-0  | 2-Ethyl-3-methylpyrazine                     | 2.45                  | 1.36                    | Not PBT            |             |                         |                         |                  |
| 2847-30-5   | 2-Methoxy-3-methylpyrazine                   | 2.49                  | 1.41                    | Not PBT            |             |                         |                         | x                |
| 206-44-0    | Fluoranthene                                 | 2.13                  | 1.48                    | PT                 |             | U120                    |                         | x                |
| 1139-30-6   | (-)-Carophyllene oxide                       | 6.36                  | 1.53                    | PBT                |             |                         |                         | x                |
| 101-86-0    | 2-(Phenylmethylene)octanal                   | 2.65                  | 1.54                    | T                  |             |                         |                         | x                |
| 84-75-3     | Dihexyl phthalate                            | 2.58                  | 1.58                    | T                  |             |                         |                         |                  |
| 7440-43-9   | Cadmium                                      | 2.91                  | 1.69                    | Metals             | CA, RT, RDT | Listed                  |                         | x                |
| 7440-41-7   | Beryllium                                    | 2.70                  | 1.70                    | Metals             | CA          | Listed                  |                         | x                |
| 7440-48-4   | Cobalt                                       | 3.62                  | 1.74                    | Metals             | CA, CT      |                         |                         | x                |
| 140-66-9    | 4-(1,1,3,3-Tetramethylbutyl)phenol           | 2.32                  | 1.74                    | T                  |             |                         |                         | x                |
| 141-12-8    | cis-3,7-Dimethyl-2,6-octadien-1-yl acetate   | 2.95                  | 1.75                    | T                  |             |                         |                         | x                |
| 94-26-8     | 4-Hydroxybenzoic acid butyl ester            | 4.03                  | 1.77                    | T                  |             |                         |                         | x                |
| 56038-13-2  | Sucralose                                    | 2.28                  | 1.79                    | Not PBT            |             |                         |                         | x                |

| CASRN      | PREFERRED_NAME                         | log Acute HC50 (µg/L) | log Chronic HC50 (µg/L) | PBT classification | HPHC        | Hazardous waste listing | Cigarette butt leachate | Tobacco chemical |
|------------|----------------------------------------|-----------------------|-------------------------|--------------------|-------------|-------------------------|-------------------------|------------------|
| 123-68-2   | Allyl hexanoate                        | 2.77                  | 1.81                    | T                  |             |                         |                         |                  |
| 127-91-3   | beta-Pinene                            | 2.90                  | 1.90                    | T                  |             |                         |                         |                  |
| 7440-66-6  | Zinc                                   | 3.22                  | 1.92                    | Metals             |             |                         |                         | x                |
| 487-19-4   | Pyridine, 3-(1-methyl-1H-pyrrol-2-yl)- | 3.64                  | 1.94                    | PT                 |             |                         |                         |                  |
| 105-21-5   | gamma-Heptalactone                     | 1.58                  | 1.95                    | T                  |             |                         |                         | x                |
| 83-32-9    | Acenaphthene                           | 2.96                  | 1.96                    | PT                 |             |                         |                         |                  |
| 126-72-7   | Tris(2,3-dibromopropyl) phosphate      | 3.00                  | 2.00                    | PT                 |             | U235                    |                         |                  |
| 6378-65-0  | Hexyl hexanoate                        | 3.28                  | 2.00                    | T                  |             |                         |                         | x                |
| 22839-47-0 | Aspartame                              | 3.41                  | 2.04                    | Not PBT            |             |                         |                         |                  |
| 4674-50-4  | Nootkatone                             | 2.76                  | 2.08                    | T                  |             |                         |                         | x                |
| 13754-86-4 | 1,5,6,7-Tetrahydro-4H-indol-4-one      | 3.89                  | 2.08                    | T                  |             |                         |                         |                  |
| 1241-94-7  | 2-Ethylhexyl diphenyl phosphate        | 2.84                  | 2.09                    | PT                 |             |                         |                         | x                |
| 128-37-0   | Butylated hydroxytoluene               | 3.04                  | 2.10                    | PT                 |             |                         |                         | x                |
| 218-01-9   | Chrysene                               | 3.10                  | 2.10                    | PBT                | CA, CT      | U050                    |                         | x                |
| 85-01-8    | Phenanthrene                           | 2.67                  | 2.12                    | PBT                |             |                         |                         | x                |
| 85-68-7    | Benzyl butyl phthalate                 | 2.95                  | 2.17                    | T                  |             | Listed                  |                         | x                |
| 4680-24-4  | cis-(+)-Limonene oxide                 | 3.48                  | 2.18                    | T                  |             |                         |                         | x                |
| 208-96-8   | Acenaphthylene                         | 3.20                  | 2.20                    | T                  |             |                         |                         | x                |
| 928-95-0   | (E)-2-Hexen-1-ol                       | 4.32                  | 2.20                    | T                  |             |                         |                         | x                |
| 84-69-5    | Diisobutyl phthalate                   | 3.25                  | 2.25                    | T                  |             |                         |                         | x                |
| 7440-62-2  | Vanadium                               | 3.27                  | 2.27                    | Metals             |             |                         |                         | x                |
| 1825-62-3  | Ethoxytrimethylsilane                  | 3.20                  | 2.32                    | T                  |             |                         |                         |                  |
| 535-77-3   | m-Cymene                               | 2.98                  | 2.34                    | T                  |             |                         |                         |                  |
| 1072-83-9  | 2-Acetylpyrrole                        | 4.34                  | 2.34                    | T                  |             |                         |                         |                  |
| 54-11-5    | Nicotine                               | 3.36                  | 2.36                    | PT                 | RDT, AD     | P075                    |                         | x                |
| 2623-23-6  | L-Menthyl acetate                      | 2.93                  | 2.36                    | T                  |             |                         |                         | x                |
| 586-62-9   | Terpinolene                            | 3.37                  | 2.37                    | BT                 |             |                         |                         |                  |
| 7440-02-0  | Nickel                                 | 3.38                  | 2.38                    | Metals             | CA, RT      | Listed                  |                         | x                |
| 86-73-7    | Fluorene                               | 3.38                  | 2.38                    | PT                 |             |                         |                         |                  |
| 7440-38-2  | Arsenic                                | 3.39                  | 2.39                    | Metals             | CA, CT, RDT | Listed                  |                         | x                |

| CASRN      | PREFERRED_NAME                              | log Acute HC50 (µg/L) | log Chronic HC50 (µg/L) | PBT classification | HPHC        | Hazardous waste listing | Cigarette butt leachate | Tobacco chemical |
|------------|---------------------------------------------|-----------------------|-------------------------|--------------------|-------------|-------------------------|-------------------------|------------------|
| 123-29-5   | Ethyl nonanoate                             | 3.52                  | 2.40                    | T                  |             |                         |                         |                  |
| 120-51-4   | Benzyl benzoate                             | 3.21                  | 2.40                    | T                  |             |                         |                         | x                |
| 96-76-4    | 2,4-Di-tert-butylphenol                     | 3.21                  | 2.40                    | T                  |             |                         |                         | x                |
| 117-81-7   | Di(2-ethylhexyl) phthalate                  | 3.63                  | 2.41                    | BT                 |             | U028                    |                         | x                |
| 10484-09-0 | Allyl salicylate                            | 3.51                  | 2.41                    | T                  |             |                         |                         | x                |
| 84-74-2    | 1,2-Benzenedicarboxylic acid, dibutyl ester | 3.17                  | 2.43                    | T                  |             | U069                    |                         | x                |
| 54060-30-9 | Benzenamine, 3-ethynyl-                     | 4.23                  | 2.43                    | PT                 |             |                         |                         | x                |
| 103-50-4   | Dibenzyl ether                              | 3.44                  | 2.44                    | PT                 |             |                         |                         | x                |
| 23726-91-2 | (E)-beta-Damascone                          | 3.08                  | 2.45                    | T                  |             |                         |                         | x                |
| 10032-15-2 | Hexyl 2-methylbutanoate                     | 3.56                  | 2.46                    | T                  |             |                         |                         | x                |
| 112-31-2   | Decanal                                     | 3.33                  | 2.50                    | T                  |             |                         |                         | x                |
| 84-61-7    | Dicyclohexyl phthalate                      | 3.01                  | 2.51                    | T                  |             |                         |                         | x                |
| 7439-92-1  | Lead                                        | 3.55                  | 2.55                    | Metals             | CA, CT, RDT | Listed                  |                         | x                |
| 127-41-3   | alpha-Ionone                                | 3.18                  | 2.56                    | T                  |             |                         |                         | x                |
| 4437-20-1  | Furan, 2,2'-[dithiobis(methylene)]bis-      | 3.32                  | 2.56                    | PT                 |             |                         |                         |                  |
| 138-87-4   | beta-Terpineol                              | 3.72                  | 2.57                    | T                  |             |                         |                         | x                |
| 7440-28-0  | Thallium                                    | 3.60                  | 2.60                    | Metals             |             | Listed                  |                         |                  |
| 494-52-0   | L-3-(2'-Piperidyl)pyridine                  | 3.30                  | 2.60                    | T                  | AD          |                         |                         | x                |
| 125-12-2   | Isobornyl acetate                           | 3.61                  | 2.61                    | T                  |             |                         |                         | x                |
| 5989-27-5  | D-Limonene                                  | 3.73                  | 2.61                    | T                  |             |                         |                         |                  |
| 5405-41-4  | Ethyl 3-hydroxybutyrate                     | 2.60                  | 2.63                    | Not PBT            |             |                         |                         | x                |
| 13674-87-8 | Tris(1,3-dichloro-2-propyl) phosphate       | 3.65                  | 2.67                    | PT                 |             |                         | x                       | x                |
| 532-12-7   | Myosmine                                    | 3.32                  | 2.69                    | T                  |             |                         |                         |                  |
| 141-02-6   | 2-Ethylhexyl fumarate                       | 2.41                  | 2.71                    | T                  |             |                         | x                       | x                |
| 103-41-3   | Benzyl cinnamate                            | 3.04                  | 2.71                    | T                  |             |                         |                         |                  |
| 2743-90-0  | D,L-Anatabine                               | 3.36                  | 2.71                    | T                  |             |                         |                         | x                |
| 102-19-2   | 3-Methylbutyl phenylacetate                 | 3.75                  | 2.72                    | T                  |             |                         |                         |                  |
| 142-92-7   | Hexyl acetate                               | 3.73                  | 2.73                    | T                  |             |                         |                         | x                |
| 106-32-1   | Ethyl octanoate                             | 3.76                  | 2.79                    | T                  |             |                         |                         | x                |
| 2639-63-6  | Hexyl butyrate                              | 3.76                  | 2.79                    | T                  |             |                         | x                       | x                |

| CASRN      | PREFERRED_NAME                                    | log Acute HC50 (µg/L) | log Chronic HC50 (µg/L) | PBT classification | HPHC           | Hazardous waste listing | Cigarette butt leachate | Tobacco chemical |
|------------|---------------------------------------------------|-----------------------|-------------------------|--------------------|----------------|-------------------------|-------------------------|------------------|
| 7429-90-5  | Aluminum                                          | 3.30                  | 2.80                    | Metals             |                |                         |                         | x                |
| 140-67-0   | Estragole                                         | 3.64                  | 2.83                    | T                  |                |                         |                         |                  |
| 99-85-4    | gamma-Terpinene                                   | 3.84                  | 2.84                    | T                  |                |                         |                         | x                |
| 25415-62-7 | Butanoic acid, 3-methyl-, pentyl ester            | 3.80                  | 2.85                    | T                  |                |                         |                         | x                |
| 513-08-6   | Tripropyl phosphate                               | 2.00                  | 2.85                    | T                  |                |                         |                         |                  |
| 150-84-5   | Citronellyl acetate                               | 3.85                  | 2.85                    | T                  |                |                         |                         | x                |
| 93-08-3    | 2'-Acetonaphthone                                 | 3.88                  | 2.88                    | T                  |                |                         |                         | x                |
| 57-71-6    | 2,3-Butanedione-2-oxime                           | 4.11                  | 2.89                    | T                  |                |                         |                         | x                |
| 7440-47-3  | Chromium                                          | 3.89                  | 2.89                    | Metals             | CA, RT, RDT    | Listed                  |                         | x                |
| 3848-24-6  | 2,3-Hexanedione                                   | 3.83                  | 2.89                    | Not PBT            |                |                         |                         | x                |
| 14371-10-9 | (2E)-3-Phenylprop-2-enal                          | 4.00                  | 2.89                    | T                  |                |                         |                         | x                |
| 2415-72-7  | Cyclopropane, propyl-                             | 4.08                  | 2.89                    | T                  |                |                         |                         | x                |
| 21129-27-1 | Cyclohexanol, 1-methyl-4-(1-methylethyl)-         | 3.72                  | 2.90                    | T                  |                |                         | x                       | x                |
| 104-46-1   | Anethole                                          | 4.11                  | 2.90                    | T                  |                |                         |                         | x                |
| 659-70-1   | 3-Methylbutyl 3-methylbutanoate                   | 3.84                  | 2.91                    | T                  |                |                         |                         |                  |
| 91-64-5    | Coumarin                                          | 3.92                  | 2.92                    | T                  | Banned in food |                         | x                       | x                |
| 89-79-2    | (-)-Isopulegol                                    | 4.62                  | 2.92                    | T                  |                |                         | x                       | x                |
| 119-61-9   | Benzophenone                                      | 3.55                  | 2.93                    | T                  |                |                         |                         |                  |
| 1504-74-1  | 2'-Methoxycinnamaldehyde                          | 4.08                  | 2.93                    | T                  |                |                         | x                       | x                |
| 80-56-8    | alpha-Pinene                                      | 3.94                  | 2.94                    | BT                 |                |                         |                         |                  |
| 115-86-6   | Triphenyl phosphate                               | 3.17                  | 2.94                    | PT                 |                |                         |                         |                  |
| 89-83-8    | Thymol                                            | 3.94                  | 2.94                    | T                  |                |                         |                         |                  |
| 61683-99-6 | 1,3-Benzodioxole, 5-(4-methyl-1,3-dioxolan-2-yl)- | 4.90                  | 2.95                    | T                  |                |                         |                         | x                |
| 562-74-3   | 4-Methyl-1-(propan-2-yl)cyclohex-3-en-1-ol        | 5.94                  | 2.96                    | T                  |                |                         | x                       | x                |
| 94-86-0    | 2-Ethoxy-5-(1-propenyl)phenol                     | 3.48                  | 2.97                    | T                  |                |                         | x                       | x                |
| 22438-36-4 | Butane, 2-[[1-methylethylthio]-                   | 3.81                  | 2.98                    | PT                 |                |                         | x                       | x                |
| 108-38-3   | m-Xylene                                          | 3.99                  | 2.99                    | T                  |                |                         |                         | x                |
| 103-54-8   | 3-Phenylprop-2-en-1-yl acetate                    | 3.97                  | 3.00                    | T                  |                |                         |                         | x                |
| 79-77-6    | beta-Ionone                                       | 3.85                  | 3.02                    | T                  |                |                         |                         | x                |

| CASRN      | PREFERRED_NAME                    | log Acute HC50 (µg/L) | log Chronic HC50 (µg/L) | PBT classification | HPHC            | Hazardous waste listing | Cigarette butt leachate | Tobacco chemical |
|------------|-----------------------------------|-----------------------|-------------------------|--------------------|-----------------|-------------------------|-------------------------|------------------|
| 94-13-3    | Propylparaben                     | 4.03                  | 3.03                    | T                  |                 |                         | x                       | x                |
| 7440-31-5  | Tin                               | 4.03                  | 3.03                    | Metals             |                 |                         |                         | x                |
| 95-47-6    | o-Xylene                          | 4.04                  | 3.04                    | T                  |                 |                         |                         | x                |
| 120-57-0   | Piperonal                         | 4.11                  | 3.04                    | T                  |                 |                         |                         | x                |
| 141-27-5   | (2E)-3,7-dimethylocta-2,6-dienal  | 4.23                  | 3.05                    | T                  |                 |                         |                         | x                |
| 5392-40-5  | 3,7-Dimethyl-2,6-octadienal       | 4.65                  | 3.05                    | T                  |                 |                         |                         | x                |
| 24851-98-7 | Methyl dihydrojasmonate           | 4.30                  | 3.06                    | T                  |                 |                         |                         | x                |
| 103-26-4   | Methyl cinnamate                  | 3.87                  | 3.07                    | T                  |                 |                         |                         | x                |
| 2305-05-7  | gamma-Dodecalactone               | 3.40                  | 3.08                    | T                  |                 |                         |                         | x                |
| 106-42-3   | p-Xylene                          | 3.96                  | 3.08                    | T                  |                 |                         |                         | x                |
| 99-86-5    | alpha-Terpinene                   | 3.87                  | 3.08                    | T                  |                 |                         |                         | x                |
| 470-67-7   | 1,4-Cineole                       | 3.96                  | 3.11                    | T                  |                 |                         |                         |                  |
| 104-87-0   | 4-Methylbenzaldehyde              | 5.13                  | 3.11                    | T                  |                 |                         |                         |                  |
| 106-23-0   | Citronellal                       | 4.09                  | 3.12                    | T                  |                 |                         |                         | x                |
| 2385-77-5  | (3R)-3,7-Dimethyloct-6-enal       | 4.09                  | 3.12                    | T                  |                 |                         |                         |                  |
| 140-11-4   | Benzyl acetate                    | 4.13                  | 3.13                    | T                  | Proposed;<br>RT |                         |                         |                  |
| 97-53-0    | Eugenol                           | 3.99                  | 3.15                    | T                  |                 |                         |                         | x                |
| 91-20-3    | Naphthalene                       | 3.62                  | 3.17                    | T                  | CA, RT          | U165                    |                         | x                |
| 25586-57-6 | Phenol, 2-methoxy(2-propenyl)-    | 3.75                  | 3.18                    | T                  |                 |                         |                         | x                |
| 106-30-9   | Ethyl heptanoate                  | 4.00                  | 3.18                    | T                  |                 |                         | x                       | x                |
| 105-87-3   | Geranyl acetate                   | 4.18                  | 3.18                    | T                  |                 |                         |                         | x                |
| 6358-64-1  | 2,5-Dimethoxy-4-chloroaniline     | 4.20                  | 3.20                    | T                  |                 |                         |                         | x                |
| 492-88-6   | Benzaldehyde, 3-ethoxy-2-hydroxy- | 4.30                  | 3.20                    | T                  |                 |                         |                         |                  |
| 93-89-0    | Ethyl benzoate                    | 4.21                  | 3.21                    | T                  |                 |                         |                         | x                |
| 106-27-4   | Isopentyl butyrate                | 4.04                  | 3.23                    | T                  |                 |                         | x                       | x                |
| 100-41-4   | Ethylbenzene                      | 4.24                  | 3.23                    | T                  | CA              |                         | x                       | x                |
| 66-25-1    | Hexanal                           | 4.24                  | 3.24                    | T                  |                 |                         |                         |                  |
| 100-42-5   | Styrene                           | 4.25                  | 3.25                    | T                  | CA              |                         |                         | x                |
| 6008-27-1  | Nonalactone                       | 3.63                  | 3.26                    | T                  |                 |                         |                         | x                |
| 104-55-2   | 3-Phenylprop-2-enal               | 4.10                  | 3.26                    | T                  |                 |                         |                         | x                |



| CASRN      | PREFERRED_NAME                      | log Acute HC50 (µg/L) | log Chronic HC50 (µg/L) | PBT classification | HPHC         | Hazardous waste listing | Cigarette butt leachate | Tobacco chemical |
|------------|-------------------------------------|-----------------------|-------------------------|--------------------|--------------|-------------------------|-------------------------|------------------|
| 98-01-1    | Furfural                            | 4.31                  | 3.27                    | T                  | Proposed; RT | U125                    |                         | x                |
| 2050-01-3  | Isopentyl isobutyrate               | 4.08                  | 3.28                    | T                  |              |                         |                         |                  |
| 14765-30-1 | 2-sec-Butylcyclohexan-1-one         | 4.15                  | 3.28                    | T                  |              |                         | x                       | x                |
| 118-61-6   | Ethyl salicylate                    | 4.30                  | 3.30                    | T                  |              |                         | x                       | x                |
| 120-50-3   | Isobutyl benzoate                   | 4.11                  | 3.30                    | T                  |              |                         |                         | x                |
| 7440-36-0  | Antimony & Antimony Compounds       | 4.31                  | 3.31                    | Metals             |              | Listed                  |                         | x                |
| 121-39-1   | Ethyl 2,3-epoxy-3-phenylpropionate  | 4.11                  | 3.32                    | T                  |              |                         |                         |                  |
| 99-87-6    | p-Cymene                            | 4.33                  | 3.33                    | T                  |              |                         |                         |                  |
| 7452-79-1  | Ethyl 2-methylbutyrate              | 4.06                  | 3.34                    | T                  |              |                         | x                       | x                |
| 78-42-2    | Tris(2-ethylhexyl) phosphate        | 4.34                  | 3.34                    | PT                 |              |                         | x                       | x                |
| 89-80-5    | dl-Menthone                         | 4.53                  | 3.34                    | T                  |              |                         |                         | x                |
| 122-63-4   | Benzyl propanoate                   | 4.34                  | 3.34                    | T                  |              |                         |                         | x                |
| 108-88-3   | Toluene                             | 4.65                  | 3.35                    | T                  | RT, RDT      | U220                    |                         | x                |
| 104-61-0   | gamma-Nonanolactone                 | 4.17                  | 3.35                    | T                  |              |                         |                         | x                |
| 104-67-6   | 5-Heptyldihydro-2(3H)-furanone      | 4.17                  | 3.35                    | T                  |              |                         |                         | x                |
| 706-14-9   | gamma-Decanolactone                 | 4.19                  | 3.35                    | T                  |              |                         | x                       | x                |
| 1632-73-1  | Fenchol                             | 4.23                  | 3.36                    | T                  |              |                         |                         | x                |
| 20921-04-4 | Ethyl 3-(2-hydroxyphenyl)propanoate | 4.23                  | 3.36                    | T                  |              |                         |                         |                  |
| 2217-02-9  | (1R)-endo-(+)-Fenchyl alcohol       | 4.23                  | 3.36                    | T                  |              |                         |                         |                  |
| 134-20-3   | Methyl 2-aminobenzoate              | 4.35                  | 3.37                    | T                  |              |                         |                         |                  |
| 120-47-8   | Ethylparaben                        | 4.23                  | 3.39                    | T                  |              |                         |                         |                  |
| 106-22-9   | Citronellol                         | 3.93                  | 3.39                    | T                  |              |                         |                         |                  |
| 80-26-2    | alpha-Terpinyl acetate              | 4.39                  | 3.39                    | T                  |              |                         | x                       | x                |
| 93-15-2    | Methyleugenol                       | 4.40                  | 3.40                    | T                  |              |                         |                         | x                |
| 99-93-4    | 4-Hydroxyacetophenone               | 4.32                  | 3.41                    | T                  |              |                         |                         |                  |
| 103-37-7   | Benzyl butyrate                     | 3.61                  | 3.43                    | T                  |              |                         |                         | x                |
| 106-24-1   | (2E)-3,7-Dimethyl-2,6-octadien-1-ol | 4.30                  | 3.44                    | T                  |              |                         | x                       | x                |
| 334-48-5   | Decanoic acid                       | 3.88                  | 3.45                    | T                  |              |                         |                         |                  |
| 15932-80-6 | Pulegone                            | 4.40                  | 3.45                    | T                  |              |                         |                         | x                |
| 6154-04-7  | 5-Amino-2-methyl-2H-tetrazole       | 4.41                  | 3.45                    | P                  |              |                         |                         | x                |

| CASRN      | PREFERRED_NAME                    | log Acute HC50 (µg/L) | log Chronic HC50 (µg/L) | PBT classification | HPHC   | Hazardous waste listing | Cigarette butt leachate | Tobacco chemical |
|------------|-----------------------------------|-----------------------|-------------------------|--------------------|--------|-------------------------|-------------------------|------------------|
| 713-95-1   | delta-Dodecalactone               | 4.45                  | 3.45                    | T                  |        |                         |                         |                  |
| 78-69-3    | 3,7-Dimethyl-3-octanol            | 4.22                  | 3.46                    | T                  |        |                         |                         | x                |
| 100-52-7   | Benzaldehyde                      | 4.47                  | 3.47                    | T                  |        |                         |                         |                  |
| 99-49-0    | dl-Carvone                        | 4.47                  | 3.47                    | T                  |        |                         |                         | x                |
| 89-78-1    | dl-Menthol                        | 4.75                  | 3.47                    | T                  |        |                         |                         | x                |
| 624-54-4   | Pentyl propionate                 | 4.68                  | 3.48                    | T                  |        |                         |                         |                  |
| 138-86-3   | Limonene                          | 4.49                  | 3.49                    | T                  |        |                         |                         |                  |
| 131-17-9   | Diallyl phthalate                 | 3.66                  | 3.49                    | T                  |        |                         |                         |                  |
| 120-45-6   | 1-Phenylethyl propionate          | 3.66                  | 3.49                    | T                  |        |                         |                         | x                |
| 93-28-7    | Acetyeugenol                      | 4.26                  | 3.49                    | T                  |        |                         |                         |                  |
| 65-85-0    | Benzoic acid                      | 4.96                  | 3.50                    | Not PBT            |        |                         |                         | x                |
| 122-00-9   | p-Methylacetophenone              | 4.50                  | 3.50                    | T                  |        |                         |                         |                  |
| 7439-96-5  | Manganese                         | 4.50                  | 3.50                    | Metals             |        |                         |                         |                  |
| 123-66-0   | Ethyl hexanoate                   | 4.01                  | 3.53                    | T                  |        |                         |                         |                  |
| 35408-14-1 | 8-Methylnona-3,7-dien-2-one       | 4.04                  | 3.53                    | T                  |        |                         |                         |                  |
| 109-21-7   | Butyl butyrate                    | 4.06                  | 3.53                    | T                  |        |                         |                         | x                |
| 126-73-8   | Tributyl phosphate                | 4.10                  | 3.56                    | T                  |        |                         |                         |                  |
| 89-81-6    | Piperitone                        | 4.08                  | 3.57                    | T                  |        |                         |                         |                  |
| 705-86-2   | 6-Pentyltetrahydro-2H-pyran-2-one | 4.57                  | 3.57                    | T                  |        |                         |                         | x                |
| 1330-20-7  | Xylenes                           | 4.59                  | 3.59                    | T                  |        | U239                    |                         | x                |
| 620-02-0   | 2-Furancarboxaldehyde, 5-methyl-  | 4.36                  | 3.60                    | T                  |        |                         |                         | x                |
| 16543-55-8 | N'-Nitrosornicotine               | 4.40                  | 3.60                    | PT                 | CA     | Listed                  |                         |                  |
| 115-95-7   | Linalyl acetate                   | 4.43                  | 3.61                    | T                  |        |                         |                         | x                |
| 108-05-4   | Vinyl acetate                     | 4.61                  | 3.61                    | T                  | CA, RT |                         |                         | x                |
| 103-36-6   | Ethyl cinnamate                   | 3.86                  | 3.61                    | T                  |        |                         |                         | x                |
| 85-91-6    | Methyl N-methylantranilate        | 4.30                  | 3.61                    | T                  |        |                         |                         | x                |
| 77-83-8    | Ethyl methylphenylglycidate       | 4.35                  | 3.63                    | T                  |        |                         |                         | x                |
| 78-51-3    | Tris(2-butoxyethyl) phosphate     | 4.50                  | 3.64                    | T                  |        |                         |                         | x                |
| 93-51-6    | 2-Methoxy-4-methylphenol          | 5.18                  | 3.64                    | T                  |        |                         |                         | x                |
| 1599-49-1  | 1,3-Dioxolane, 4-methyl-2-pentyl- | 4.56                  | 3.67                    | T                  |        |                         |                         | x                |
| 93-92-5    | (+/-)-alpha-Methylbenzyl acetate  | 4.47                  | 3.70                    | T                  |        |                         |                         | x                |

| CASRN      | PREFERRED_NAME                               | log Acute HC50 (µg/L) | log Chronic HC50 (µg/L) | PBT classification | HPHC   | Hazardous waste listing | Cigarette butt leachate | Tobacco chemical |
|------------|----------------------------------------------|-----------------------|-------------------------|--------------------|--------|-------------------------|-------------------------|------------------|
| 127-63-9   | Diphenylsulfone                              | 3.99                  | 3.72                    | PT                 |        |                         |                         | x                |
| 98-55-5    | alpha-Terpineol                              | 4.73                  | 3.73                    | T                  |        |                         |                         | x                |
| 18278-34-7 | 4-Hydroxy-2-methoxybenzaldehyde              | 4.54                  | 3.73                    | T                  |        |                         |                         | x                |
| 8000-41-7  | Terpineol                                    | 4.75                  | 3.75                    | T                  |        |                         |                         | x                |
| 7492-70-8  | 1-Butoxy-1-oxopropan-2-yl butanoate          | 3.86                  | 3.75                    | T                  |        |                         |                         | x                |
| 76-22-2    | Camphor                                      | 4.75                  | 3.75                    | T                  |        |                         |                         | x                |
| 14073-97-3 | (2S,5R)-2-Isopropyl-5-methylcyclohexan-1-one | 4.76                  | 3.76                    | T                  |        |                         |                         | x                |
| 1490-04-6  | Menthol                                      | 4.36                  | 3.77                    | T                  |        |                         |                         | x                |
| 6485-40-1  | R-(-)-Carvone                                | 4.78                  | 3.78                    | T                  |        |                         |                         | x                |
| 99-76-3    | Methylparaben                                | 4.73                  | 3.78                    | T                  |        |                         | x                       | x                |
| 120-14-9   | Veratraldehyde                               | 4.88                  | 3.79                    | T                  |        |                         |                         |                  |
| 50-00-0    | Formaldehyde                                 | 4.60                  | 3.80                    | T                  | CA, RT | U122                    |                         | x                |
| 110-82-7   | Cyclohexane                                  | 4.80                  | 3.80                    | T                  |        | U056                    |                         |                  |
| 13674-84-5 | Tris(2-chloroisopropyl)phosphate             | 4.81                  | 3.81                    | PT                 |        |                         | x                       | x                |
| 101-97-3   | Ethyl phenylacetate                          | 4.01                  | 3.81                    | T                  |        |                         | x                       | x                |
| 609-40-5   | Thiophene, 2-nitro-                          | 4.57                  | 3.81                    | PT                 |        |                         | x                       | x                |
| 109-52-4   | Pentanoic acid                               | 4.82                  | 3.82                    | Not PBT            |        |                         |                         |                  |
| 5579-78-2  | epsilon-Decalactone                          | 3.88                  | 3.83                    | T                  |        |                         |                         | x                |
| 103-82-2   | Phenylacetic acid                            | 4.84                  | 3.84                    | Not PBT            |        |                         | x                       | x                |
| 104-54-1   | 3-Phenyl-2-propen-1-ol                       | 4.86                  | 3.86                    | T                  |        |                         |                         | x                |
| 3681-71-8  | (3Z)-3-Hexenyl acetate                       | 4.55                  | 3.86                    | T                  |        |                         |                         | x                |
| 67-56-1    | Methanol                                     | 6.29                  | 3.88                    | Not PBT            |        | U154                    |                         | x                |
| 57583-54-7 | Tetraphenyl m-phenylene bis(phosphate)       | 4.89                  | 3.89                    | PT                 |        |                         |                         | x                |
| 123-35-3   | Myrcene                                      | 4.89                  | 3.89                    | T                  |        |                         |                         | x                |
| 119-36-8   | Methyl salicylate                            | 4.90                  | 3.90                    | T                  |        |                         |                         | x                |
| 10599-70-9 | 3-Acetyl-2,5-dimethylfuran                   | 4.82                  | 3.90                    | T                  |        |                         |                         | x                |
| 1124-11-4  | Tetramethylpyrazine                          | 5.04                  | 3.90                    | T                  |        |                         |                         | x                |
| 628-63-7   | Pentyl acetate                               | 5.32                  | 3.91                    | T                  |        |                         |                         |                  |
| 106-70-7   | Methyl hexanoate                             | 4.79                  | 3.91                    | T                  |        |                         | x                       | x                |
| 121-33-5   | 4-Hydroxy-3-methoxybenzaldehyde              | 4.93                  | 3.93                    | T                  |        |                         |                         |                  |

| CASRN     | PREFERRED_NAME                       | log Acute HC50 (µg/L) | log Chronic HC50 (µg/L) | PBT classification | HPHC         | Hazardous waste listing | Cigarette butt leachate | Tobacco chemical |
|-----------|--------------------------------------|-----------------------|-------------------------|--------------------|--------------|-------------------------|-------------------------|------------------|
| 75-07-0   | Acetaldehyde                         | 4.95                  | 3.95                    | Not PBT            | CA, RT, AD   | U001                    |                         |                  |
| 108-64-5  | Ethyl isovalerate                    | 4.51                  | 3.97                    | T                  |              |                         |                         | x                |
| 624-41-9  | 2-Methylbutyl acetate                | 4.51                  | 3.97                    | T                  |              |                         |                         |                  |
| 5471-51-2 | 4-(4-Hydroxyphenyl)butan-2-one       | 4.91                  | 3.97                    | T                  |              |                         |                         | x                |
| 79-09-4   | Propionic acid                       | 4.97                  | 3.97                    | Not PBT            | Proposed; RT |                         |                         | x                |
| 3658-77-3 | 4-Hydroxy-2,5-dimethyl-3(2H)furanone | 4.60                  | 3.97                    | T                  |              |                         |                         | x                |
| 84-66-2   | Diethyl phthalate                    | 4.51                  | 3.99                    | T                  |              | U088                    |                         | x                |
| 110-93-0  | 6-Methyl-5-hepten-2-one              | 4.99                  | 3.99                    | T                  |              |                         |                         |                  |
| 78-70-6   | Linalool                             | 4.67                  | 3.99                    | T                  |              |                         |                         |                  |
| 60-35-5   | Acetamide                            | 7.00                  | 4.00                    | T                  | CA           |                         |                         |                  |
| 123-92-2  | 3-Methylbutyl acetate                | 5.00                  | 4.00                    | T                  | Proposed; RT |                         |                         | x                |
| 71-43-2   | Benzene                              | 4.88                  | 4.01                    | T                  | CA, CT, RDT  | U019                    |                         | x                |
| 123-86-4  | Butyl acetate                        | 5.01                  | 4.01                    | T                  |              |                         |                         | x                |
| 105-53-3  | Diethyl propanedioate                | 5.02                  | 4.02                    | T                  |              |                         |                         | x                |
| 80-71-7   | Cyclotene                            | 5.04                  | 4.04                    | T                  |              |                         |                         |                  |
| 142-62-1  | Hexanoic acid                        | 5.05                  | 4.05                    | Not PBT            |              |                         |                         | x                |
| 131-11-3  | Dimethyl phthalate                   | 4.99                  | 4.08                    | T                  |              | U102                    |                         | x                |
| 101-41-7  | Methyl phenylacetate                 | 5.11                  | 4.11                    | T                  |              |                         |                         | x                |
| 90-05-1   | 2-Methoxyphenol                      | 5.12                  | 4.12                    | T                  |              |                         |                         | x                |
| 123-11-5  | 4-Methoxybenzaldehyde                | 5.00                  | 4.13                    | T                  |              |                         |                         | x                |
| 105-37-3  | Ethyl propionate                     | 5.14                  | 4.14                    | T                  |              |                         | x                       | x                |
| 91-10-1   | 2,6-Dimethoxyphenol                  | 5.08                  | 4.15                    | Not PBT            |              |                         |                         | x                |
| 98-86-2   | Acetophenone                         | 5.18                  | 4.18                    | Not PBT            |              | U004                    |                         | x                |
| 470-82-6  | 1,8-Cineol                           | 4.97                  | 4.19                    | T                  |              |                         |                         |                  |
| 590-86-3  | 3-Methylbutanal                      | 4.48                  | 4.20                    | T                  |              |                         |                         | x                |
| 104-21-2  | 4-Methoxybenzyl acetate              | 4.70                  | 4.20                    | T                  |              |                         |                         |                  |
| 1193-11-9 | 2,2,4-Trimethyl-1,3-dioxolane        | 5.15                  | 4.20                    | Not PBT            |              |                         |                         | x                |
| 544-12-7  | 3-Hexen-1-ol                         | 5.30                  | 4.20                    | Not PBT            |              |                         | x                       | x                |

| CASRN      | PREFERRED_NAME                                            | log Acute HC50 (µg/L) | log Chronic HC50 (µg/L) | PBT classification | HPHC         | Hazardous waste listing | Cigarette butt leachate | Tobacco chemical |
|------------|-----------------------------------------------------------|-----------------------|-------------------------|--------------------|--------------|-------------------------|-------------------------|------------------|
| 100-51-6   | Benzyl alcohol                                            | 5.09                  | 4.21                    | Not PBT            |              |                         |                         | x                |
| 109-60-4   | Propyl acetate                                            | 5.21                  | 4.21                    | T                  |              |                         |                         | x                |
| 115-96-8   | Tris(2-chloroethyl) phosphate                             | 5.21                  | 4.21                    | PT                 |              |                         | x                       | x                |
| 110-86-1   | Pyridine                                                  | 5.21                  | 4.21                    | Not PBT            |              | U196                    |                         | x                |
| 92-48-8    | 6-Methyl coumarin                                         | 4.26                  | 4.23                    | T                  |              |                         |                         | x                |
| 105-13-5   | (4-Methoxyphenyl)methanol                                 | 5.25                  | 4.25                    | Not PBT            |              |                         |                         |                  |
| 100-06-1   | 4'-Methoxyacetophenone                                    | 4.92                  | 4.26                    | Not PBT            |              |                         |                         | x                |
| 111-27-3   | 1-Hexanol                                                 | 5.26                  | 4.26                    | Not PBT            |              |                         |                         | x                |
| 110-19-0   | Isobutyl acetate                                          | 5.32                  | 4.28                    | T                  | Proposed; RT |                         |                         | x                |
| 105-54-4   | Ethyl butyrate                                            | 5.88                  | 4.28                    | T                  |              |                         |                         |                  |
| 79-31-2    | 2-Methylpropanoic acid                                    | 5.38                  | 4.30                    | Not PBT            |              |                         |                         | x                |
| 2568-25-4  | 1,3-Dioxolane, 4-methyl-2-phenyl-                         | 5.26                  | 4.30                    | P                  |              |                         |                         | x                |
| 121-32-4   | 3-Ethoxy-4-hydroxybenzaldehyde                            | 5.13                  | 4.31                    | T                  |              |                         |                         | x                |
| 68527-74-2 | Phenol, 2-methoxy-4-(4-methyl-1,3-dioxolan-2-yl)-         | 5.04                  | 4.32                    | Not PBT            |              |                         |                         | x                |
| 6414-32-0  | 2-(4-Methoxyphenyl)-4-methyl-1,3-dioxolane                | 5.26                  | 4.32                    | Not PBT            |              |                         |                         | x                |
| 14667-55-1 | 2,3,5-Trimethylpyrazine                                   | 5.40                  | 4.32                    | Not PBT            |              |                         |                         | x                |
| 13925-03-6 | 2-Ethyl-6-methylpyrazine                                  | 5.45                  | 4.36                    | Not PBT            |              |                         |                         | x                |
| 77-93-0    | Triethyl citrate                                          | 5.51                  | 4.37                    | Not PBT            |              |                         |                         | x                |
| 81-07-2    | Saccharin                                                 | 5.37                  | 4.37                    | PT                 |              |                         |                         | x                |
| 87-28-5    | 2-Hydroxyethyl salicylate                                 | 4.82                  | 4.38                    | T                  |              |                         |                         | x                |
| 4940-11-8  | 2-Ethyl-3-hydroxy-4-pyrone                                | 5.38                  | 4.38                    | T                  |              |                         |                         | x                |
| 64091-91-4 | 4-(N-Methyl-N-nitrosamino)-1-(3-pyridyl)-1-butanone (NNK) | 5.52                  | 4.38                    | P                  | CA           |                         |                         |                  |
| 64-19-7    | Acetic acid                                               | 5.39                  | 4.39                    | Not PBT            | Proposed; RT |                         |                         | x                |
| 106-65-0   | Dimethyl succinate                                        | 5.45                  | 4.40                    | Not PBT            |              |                         | x                       | x                |
| 881-68-5   | Benzaldehyde, 4-(acetyloxy)-3-methoxy-                    | 4.94                  | 4.41                    | T                  |              |                         |                         | x                |
| 556-52-5   | Glycidol                                                  | 5.44                  | 4.44                    | T                  | Proposed; CA |                         |                         | x                |
| 107-92-6   | Butanoic acid                                             | 5.44                  | 4.44                    | Not PBT            |              |                         |                         | x                |

| CASRN      | PREFERRED_NAME                             | log Acute HC50 (µg/L) | log Chronic HC50 (µg/L) | PBT classification | HPHC         | Hazardous waste listing | Cigarette butt leachate | Tobacco chemical |
|------------|--------------------------------------------|-----------------------|-------------------------|--------------------|--------------|-------------------------|-------------------------|------------------|
| 928-96-1   | (Z)-3-Hexen-1-ol                           | 5.50                  | 4.50                    | Not PBT            |              |                         | x                       | x                |
| 1320-51-0  | (Hydroxyethyl)urea                         | 5.09                  | 4.54                    | Not PBT            |              |                         | x                       | x                |
| 98-00-0    | Furfuryl alcohol                           | 5.56                  | 4.56                    | Not PBT            |              |                         | x                       | x                |
| 104-50-7   | 4-Hydroxyoctanoic acid lactone             | 4.34                  | 4.58                    | T                  |              |                         | x                       | x                |
| 698-76-0   | delta-Octanolactone                        | 4.34                  | 4.58                    | T                  |              |                         |                         |                  |
| 513-86-0   | Acetoin                                    | 5.45                  | 4.58                    | Not PBT            | Proposed; RT |                         |                         | x                |
| 96-48-0    | 4-Butyrolactone                            | 5.59                  | 4.59                    | Not PBT            |              |                         |                         |                  |
| 6290-17-1  | Ethyl 2,4-dimethyl-1,3-dioxolane-2-acetate | 4.72                  | 4.59                    | T                  |              |                         |                         |                  |
| 141-97-9   | Ethyl acetoacetate                         | 5.60                  | 4.60                    | Not PBT            | Proposed; RT |                         |                         | x                |
| 105-57-7   | Acetal                                     | 5.67                  | 4.61                    | Not PBT            |              |                         |                         | x                |
| 462-95-3   | Diethoxymethane                            | 5.65                  | 4.65                    | Not PBT            |              |                         |                         | x                |
| 102-76-1   | Triacetin                                  | 5.66                  | 4.66                    | Not PBT            |              |                         |                         | x                |
| 118-71-8   | Maltol                                     | 5.64                  | 4.66                    | T                  |              |                         |                         |                  |
| 123-51-3   | Isopentyl alcohol                          | 5.70                  | 4.68                    | Not PBT            |              |                         | x                       |                  |
| 67-64-1    | Acetone                                    | 6.60                  | 4.69                    | Not PBT            | RT           | U002                    |                         | x                |
| 547-63-7   | Propanoic acid, 2-methyl-, methyl ester    | 4.94                  | 4.70                    | T                  |              |                         |                         |                  |
| 108-50-9   | 2,6-Dimethylpyrazine                       | 5.76                  | 4.72                    | Not PBT            |              |                         |                         |                  |
| 123-32-0   | 2,5-Dimethylpyrazine                       | 5.76                  | 4.72                    | Not PBT            |              |                         |                         | x                |
| 5910-89-4  | Pyrazine, 2,3-dimethyl-                    | 5.76                  | 4.72                    | Not PBT            |              |                         |                         | x                |
| 64-17-5    | Ethanol                                    | 6.36                  | 4.75                    | Not PBT            |              |                         |                         | x                |
| 116-09-6   | Hydroxyacetone                             | 5.48                  | 4.77                    | Not PBT            |              |                         |                         | x                |
| 137-00-8   | Thiamine thiozole                          | 5.76                  | 4.77                    | Not PBT            |              |                         |                         | x                |
| 141-78-6   | Ethyl acetate                              | 5.80                  | 4.80                    | T                  | Proposed; RT | U112                    |                         | x                |
| 60-12-8    | 2-Phenylethanol                            | 5.63                  | 4.82                    | Not PBT            |              |                         |                         |                  |
| 123-25-1   | Diethyl butanedioate                       | 5.15                  | 4.84                    | T                  |              |                         |                         | x                |
| 79-20-9    | Methyl acetate                             | 5.67                  | 4.85                    | T                  | Proposed; RT |                         |                         | x                |
| 59276-33-4 | 4-(Dimethoxymethyl)-1,2-dimethoxybenzene   | 5.96                  | 4.96                    | Not PBT            |              |                         |                         |                  |
| 71-41-0    | 1-Pentanol                                 | 5.65                  | 5.01                    | Not PBT            |              |                         |                         |                  |

| CASRN      | PREFERRED_NAME                           | log Acute HC50 (µg/L) | log Chronic HC50 (µg/L) | PBT classification | HPHC              | Hazardous waste listing | Cigarette butt leachate | Tobacco chemical |
|------------|------------------------------------------|-----------------------|-------------------------|--------------------|-------------------|-------------------------|-------------------------|------------------|
| 6920-22-5  | 1,2-Hexanediol                           | 4.75                  | 5.04                    | Not PBT            |                   |                         |                         | x                |
| 78-83-1    | 2-Methyl-1-propanol                      | 6.04                  | 5.04                    | Not PBT            |                   | U140                    |                         | x                |
| 119-84-6   | 3,4-Dihydrocoumarin                      | 5.28                  | 5.11                    | T                  |                   |                         |                         | x                |
| 109-08-0   | 2-Methylpyrazine                         | 5.56                  | 5.11                    | Not PBT            |                   |                         |                         | x                |
| 112-34-5   | 2-(2-Butoxyethoxy)ethanol                | 6.25                  | 5.20                    | Not PBT            |                   |                         |                         |                  |
| 1119-40-0  | Dimethyl glutarate                       | 4.76                  | 5.23                    | T                  |                   |                         |                         |                  |
| 1122-62-9  | 2-Acetylpyridine                         | 5.65                  | 5.23                    | Not PBT            |                   |                         |                         | x                |
| 6214-01-3  | 1,2-Propanediol, 2-acetate               | 6.00                  | 5.26                    | Not PBT            |                   |                         |                         | x                |
| 695-06-7   | gamma-Caprolactone                       | 4.80                  | 5.32                    | Not PBT            |                   |                         |                         |                  |
| 116-53-0   | 2-Methylbutanoic acid                    | 4.81                  | 5.32                    | Not PBT            |                   |                         |                         | x                |
| 112-36-7   | Diethylene glycol diethyl ether          | 6.43                  | 5.43                    | Not PBT            |                   |                         |                         |                  |
| 16777-87-0 | 3,3-Diethoxy-1-propanol                  | 6.58                  | 5.52                    | Not PBT            |                   |                         |                         | x                |
| 74685-84-0 |                                          | 5.49                  | 5.54                    | BT                 |                   |                         |                         | x                |
| 1708-40-3  | 1,3-Dioxan-5-ol, 2-phenyl-               | 6.56                  | 5.56                    | Not PBT            |                   |                         |                         |                  |
| 108-29-2   | 4-Pentanolide                            | 5.00                  | 5.68                    | Not PBT            |                   |                         |                         | x                |
| 78-40-0    | Triethyl phosphate                       | 5.58                  | 5.68                    | T                  |                   |                         |                         | x                |
| 107-21-1   | Ethylene glycol                          | 7.18                  | 5.93                    | Not PBT            | Proposed; RT, RDT |                         |                         |                  |
| 56-81-5    | Glycerol                                 | 6.94                  | 5.94                    | Not PBT            | Proposed; RT      |                         |                         |                  |
| 22047-25-2 | Acetylpyrazine                           | 6.88                  | 5.94                    | Not PBT            |                   |                         |                         | x                |
| 496-76-4   | 2,6-Dihydroxypyrimidin-5(4H)-one         | 7.08                  | 5.97                    | Not PBT            |                   |                         |                         | x                |
| 143-24-8   | 2,5,8,11,14-Pentaoxapentadecane          | 7.00                  | 6.00                    | Not PBT            |                   |                         |                         |                  |
| 97-64-3    | Ethyl lactate                            | 5.81                  | 6.00                    | Not PBT            |                   |                         |                         | x                |
| 67-63-0    | Isopropanol                              | 6.65                  | 6.01                    | Not PBT            |                   |                         |                         |                  |
| 765-70-8   | 3-Methyl-1,2-cyclopentanedione           | 6.96                  | 6.04                    | Not PBT            |                   |                         |                         | x                |
| 4254-15-3  | (+)-1,2-Propanediol                      | 6.75                  | 6.08                    | Not PBT            |                   |                         | x                       |                  |
| 1874-62-0  | 3-Ethoxypropane-1,2-diol                 | 7.08                  | 6.18                    | BT                 |                   |                         |                         |                  |
| 112-49-2   | Triethylene glycol dimethyl ether        | 7.20                  | 6.20                    | Not PBT            |                   |                         |                         | x                |
| 557-25-5   | Butanoic acid, 2,3-dihydroxypropyl ester | 6.00                  | 6.20                    | Not PBT            |                   |                         |                         |                  |
| 110-98-5   | 1,1'-Oxybis-2-propanol                   | 6.50                  | 6.20                    | Not PBT            |                   |                         |                         |                  |

| CASRN      | PREFERRED_NAME                                     | log Acute HC50 (µg/L) | log Chronic HC50 (µg/L) | PBT classification | HPHC         | Hazardous waste listing | Cigarette butt leachate | Tobacco chemical |
|------------|----------------------------------------------------|-----------------------|-------------------------|--------------------|--------------|-------------------------|-------------------------|------------------|
| 106-62-7   | 1-propanol, 2-(2-hydroxypropoxy)-                  | 7.11                  | 6.20                    | Not PBT            |              |                         |                         |                  |
| 600-14-6   | 2,3-Pentanedione                                   | 7.15                  | 6.23                    | Not PBT            | Proposed; RT |                         |                         |                  |
| 542-59-6   | 1,2-Ethandiol, 1-acetate                           | 5.33                  | 6.30                    | Not PBT            |              |                         |                         |                  |
| 57-55-6    | 1,2-Propylene glycol                               | 6.63                  | 6.41                    | Not PBT            | Proposed; RT |                         |                         |                  |
| 3610-27-3  | Ethanol, 2-[2-(2-methoxyethoxy)ethoxy]-, 1-acetate | 6.20                  | 6.46                    | Not PBT            |              |                         |                         |                  |
| 25395-31-7 | Diacetain glycerol                                 | 5.68                  | 6.56                    | Not PBT            |              |                         |                         |                  |
| 431-03-8   | 2,3-Butanedione                                    | 7.45                  | 6.58                    | Not PBT            | Proposed; RT |                         |                         |                  |
| 3885-29-8  | Methyl 5-oxotetrahydrofuran-2-carboxylate          | 6.30                  | 6.64                    | Not PBT            |              |                         |                         | ×                |
| 106-61-6   | Acetin, 1-mono-                                    | 6.48                  | 6.95                    | Not PBT            |              |                         |                         | ×                |
| 26446-35-5 | Acetin                                             | 6.48                  | 6.95                    | Not PBT            |              |                         |                         |                  |
| 50-70-4    | D-Glucitol                                         | 9.04                  | 8.30                    | Not PBT            |              |                         |                         | ×                |
| 5617-32-3  | Heptaethylene glycol                               | 9.72                  | 8.41                    | Not PBT            |              |                         | ×                       | ×                |
| 57-50-1    | Sucrose                                            | 11.04                 | 9.61                    | Not PBT            |              |                         |                         |                  |

## References

Venugopal PD, Hanna SK, Gagliano GG, Chang HW. No butts on the beach: Aquatic toxicity of cigarette butt leachate chemicals. *Tobacco Regulatory Science*. 2021;7(1):17-30. doi:10.18001/TRS.7.1.2

Rodgman A, Perfetti TA. 2013. The chemical components of tobacco and tobacco smoke. 2nd ed. Boca Raton, FL: CRC Press. ISBN 9781466515482. 2332 Pages
